# Supplementary material for: Engineering semiconductor quantum dots for co-upcycling of CO2 and biomass-derived alcohol
Source: Royal Society of Chemistry journal article supplement (doi:10.1039/d4ta01996b), 2024-01-01
Supplement: d4ta01996b1.pdf [file d4ta01996b1.pdf]

## Electronic Supplementary Information

# Engineering semiconductor quantum dots for co-upcycling of CO<sub>2</sub> and biomass-derived alcohol

Lin-Xing Zhang<sup>a</sup>, Zi-Rong Tang<sup>a</sup>, Ming-Yu Qi<sup>\*ab</sup> and Yi-Jun Xu<sup>\*a</sup>

<sup>a</sup>*College of Chemistry, State Key Laboratory of Photocatalysis on Energy and Environment, Fuzhou University, Fuzhou, 350116, P.R. China*

<sup>b</sup>*Institute of Fundamental and Frontier Sciences, University of Electronic Science and Technology of China, Chengdu, 611731, P.R. China*

*\*To whom correspondence should be addressed. Tel. /Fax: +86 591 22865836;*

*E-mail: myqi@uestc.edu.cn; yjxu@fzu.edu.cn*

## Content list

### Experimental procedures

**Fig. S1.** TEM images of (a) CdSe QDs, (b) CdSe/1CdS QDs, (c) CdSe/3CdS QDs and (d) CdSe/7CdS QDs. HRTEM images of (e) CdSe/1CdS QDs and (f) CdSe/7CdS QDs. (g) TEM and (h) HRTEM images of CdS QDs.

**Fig. S2.** Size distribution of (a) CdSe QDs, (b) CdSe/1CdS QDs, (c) CdSe/3CdS QDs and (d) CdSe/7CdS QDs measured by DLS.

**Fig. S3.** Zeta potential ( $\xi$ ) of BPEI-SiO<sub>2</sub> and CdSe/CdS QDs.

**Fig. S4.** XRD patterns of BPEI-SiO<sub>2</sub>, CdS/3CdS QDs and CdSe/CdS-SiO<sub>2</sub> composite.

**Fig. S5.** XPS survey spectra of CdSe/CdS QDs.

**Fig. S6.** Mass spectra of furfuryl alcohol (feedstock) and the obtained liquid products (furfural and hydrofuran).

**Fig. S7.** (a) XRD patterns and (b) DRS spectra of fresh and used CdSe/CdS-SiO<sub>2</sub> composite.

**Fig. S8.** (a) GC-MS analysis of CO<sub>2</sub> isotope tracing experiment using SH-Molecular Sieve 5A PLOT column and corresponding mass spectrum of (b) O<sub>2</sub>, (c) N<sub>2</sub> and (d) CO<sub>2</sub>.

**Fig. S9.** (a) Steady-state PL emission spectra and (b) CV curves of CdSe QDs, CdSe/CdS QDs and CdSe/CdS-SiO<sub>2</sub> composite.

**Fig. S10.** TG curves of (a) CdSe/CdS QDs and (b) CdSe/CdS-SiO<sub>2</sub> composite.

**Fig. S11.** (a) Tauc plots of CdSe and CdS QDs. Mott-Schottky plots of (b) CdSe QDs and (c) CdS QDs.

**Table S1.** The kinetic analysis of emission decay for CdSe QDs, CdSe/CdS QDs and CdSe/CdS-SiO<sub>2</sub> composite.

## Experimental procedures

### Characterization

The morphology and element distribution of samples were analyzed by transmission electron microscopy (TEM), high-resolution TEM (HRTEM) and elemental mapping analysis using a JEOL model JEM-2100F instrument supported by Shiyanjia Lab “www.shiyanjia.com”. The morphology of the samples was analyzed by scanning electron microscopy (SEM) on a FEI Nova NANO-SEM 230 spectrophotometer. The crystal structure of the sample was measured by X-ray diffraction (XRD) on a Rigaku Miniflex diffractometer with Cu K $\alpha$  radiation in the  $2\theta$  range from 10 to 80 °. X-ray photoelectron spectroscopy (XPS) was employed to analyze the surface chemical state and composition of the sample (Thermo Scientific K-Alpha). All binding energies were calibrated by the C 1s peak at 284.60 eV. The light absorption properties of the samples were assessed by ultraviolet-visible diffuse reflectance spectroscopy (DRS) on an UV-vis spectrophotometers (Thermo Scientific Evolution 200 Series), with BaSO<sub>4</sub> as a reflectance standard. Fourier transform infrared (FTIR) spectroscopy was performed on a Nicolet iS50 FT-IR spectrophotometer with a resolution of 4 cm<sup>-1</sup>. For in-situ FT-IR measurement, 20 mg of sample powders were placed onto KBr and 200  $\mu$ L CH<sub>3</sub>CN containing 0.1 mmol of furfuryl alcohol was added. The reaction system was purged with CO<sub>2</sub> for 20 min and irradiated with a 300 W Xe lamp. Dynamic light scattering (DLS) was utilized to assess the particle size of quantum dots (QDs) using the Zetasizer Nano-ZS90 instrument. The photoluminescence (PL) spectra and time-resolved PL (TRPL) decay plots of the samples were analyzed using the Edinburgh Analytical Instrument FLS980 series fluorescence spectrophotometer. Electron paramagnetic resonance (EPR) spectroscopy measurements were performed using a Bruker A300 EPR spectrometer. For typical EPR measurements, sample (20 mg) was dispersed in a 10 mL of CH<sub>3</sub>CN mixed solution containing furfuryl alcohol (0.1 mmol) and 5, 5-dimethyl-1-pyrroline N-oxide (DMPO, 0.1 mmol). Then, the suspension was injected into a glass capillary tube, and placed in a sealed glass tube under an Ar atmosphere, and irradiated with 300 W Xe arc lamp at room temperature. The thermogravimetric (TG) analysis was performed using a TGA/DSC apparatus (METTLER TGA/DSC 3+) in an N<sub>2</sub> atmosphere. A chemisorption analyzer (Micromeritics Autochem 2920) was used to conduct CO<sub>2</sub> temperature-programmed-desorption (TPD) measurements. The isotope tracing experiment was examined on the Shimadzu QP-2020 gas chromatograph-mass spectrometry (GC-MS)

using an SH-Molecular Sieve 5A PLOT column.

### **Photoelectrochemical measurements**

The photoelectrochemical and electrochemical measurements were performed using the electrochemical work station (MUTI AUTOLAB M204) in a three-electrode configuration. The Pt sheet served as the counter electrode, a saturated Ag/AgCl electrode as the reference electrode, and the working electrode was fluorine doped tin oxide (FTO) glass. Initially, transparent tape was applied to safeguard the FTO glass boundary, limiting the exposed area of the working electrode to 0.25 cm<sup>2</sup>. Subsequently, 20 mg of the sample was thoroughly dispersed in a mixture of 500  $\mu$ L of N, N-dimethylformamide (DMF) and 50  $\mu$ L of Nafion membrane solution by ultrasonic treatment, resulting in a slurry. The slurry (20  $\mu$ L) was coated on the pre-treated FTO glass and dried at 60 °C for 1 h to enhance adhesion. The transient photocurrent measurement was conducted in a 0.2 M Na<sub>2</sub>SO<sub>4</sub> aqueous solution without an applied voltage bias under the UV-vis light irradiation. Additionally, the cyclic voltammetry (CV) curves were measured in a 0.2 M Na<sub>2</sub>SO<sub>4</sub> aqueous solution. Cathodic linear sweep voltammetry (LSV) tests were performed in either Ar-saturated or CO<sub>2</sub>-saturated Na<sub>2</sub>SO<sub>4</sub> solution without light. The electrochemical impedance spectroscopy (EIS) measurement was carried out in a 0.5 M KCl solution including 0.01 M K<sub>3</sub>[Fe(CN)<sub>6</sub>]/K<sub>4</sub>[Fe(CN)<sub>6</sub>]. Mott-Schottky plots were obtained at frequencies of 500 and 1000 Hz with a bias potential ranging from -1 to 2 V vs. Ag/AgCl.

### **Photocatalytic recycling tests**

To evaluate the photocatalytic stability and recyclability of the catalyst, recycling tests were carried out. The specific experimental steps were as follows. At the end of the first photocatalytic reaction, the catalyst was washed three times with CH<sub>3</sub>CN and dried overnight at 60 °C. Then, 10 mL of CH<sub>3</sub>CN containing 0.1 mmol of furfuryl alcohol was added to the used catalyst for the second cycle test. Subsequent recycle tests were performed in a similar manner.

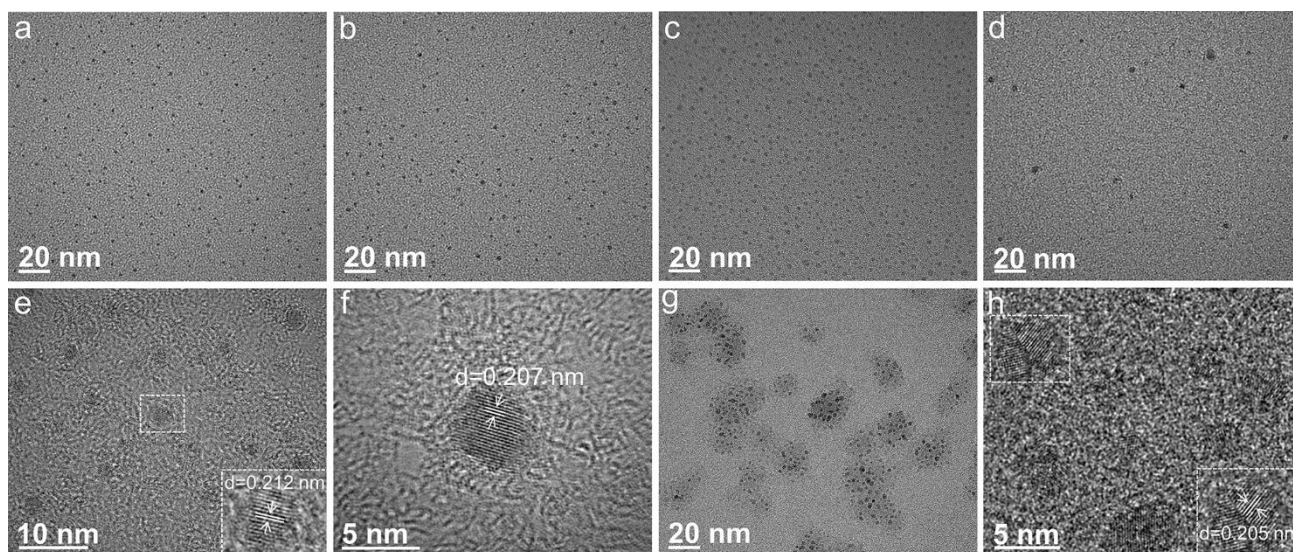

**Fig. S1.** TEM images of (a) CdSe QDs, (b) CdSe/1CdS QDs, (c) CdSe/3CdS QDs and (d) CdSe/7CdS QDs. HRTEM images of (e) CdSe/1CdS QDs and (f) CdSe/7CdS QDs. (g) TEM and (h) HRTEM images of CdS QDs.

**Note:** As depicted in **Fig. S1a-d**, the size of the CdSe/ $x$ CdS QDs ( $x = 1, 3$  and  $7$ ) increases with the thickness of the CdS shell, where  $x$  represents approximately  $x$  atomic layers of CdS shell. The lattice fringes of CdSe/1CdS QDs (0.212 nm), CdSe/3CdS QDs (0.210 nm), and CdSe/7CdS QDs (0.207 nm) gradually converge towards those of CdS QDs (0.205 nm). Furthermore, the QDs sizes measured by DLS (**Fig. S2**) are consistent with TEM results, confirming the successful synthesis of core/shell structure QDs.<sup>1</sup>

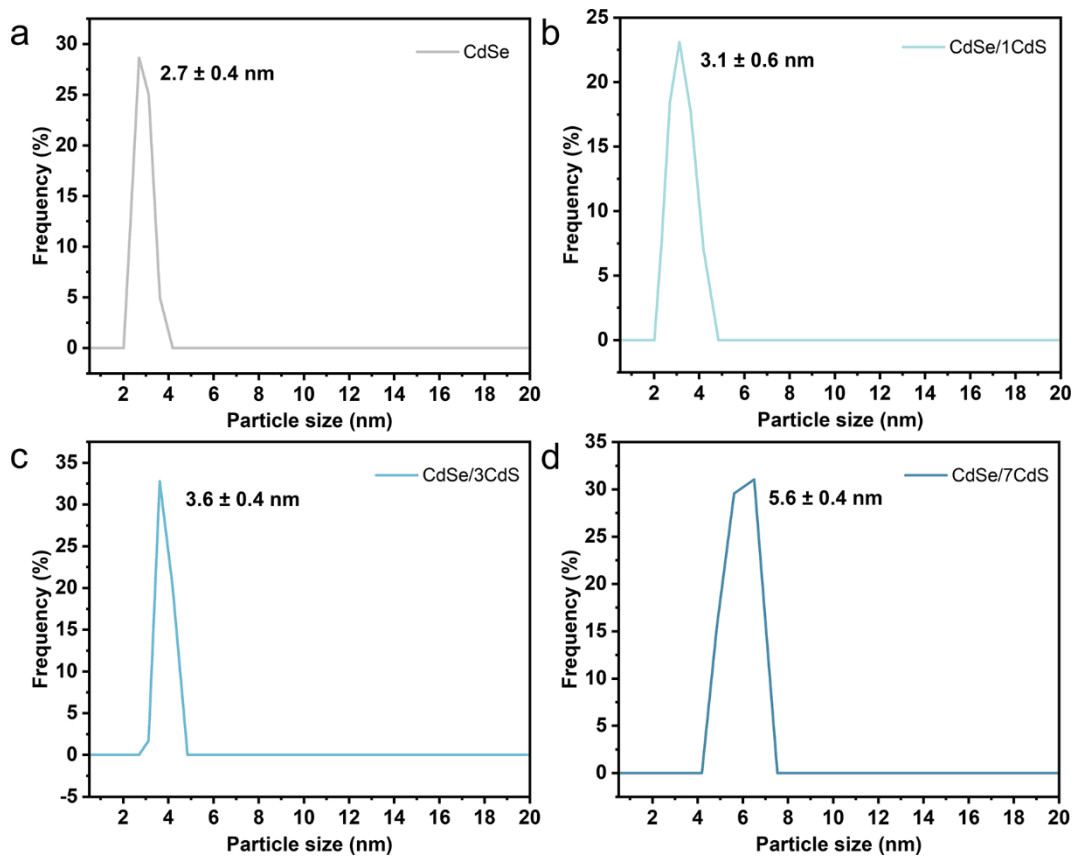

**Fig. S2.** Size distribution of (a) CdSe QDs, (b) CdSe/1CdS QDs, (c) CdSe/3CdS QDs and (d) CdSe/7CdS QDs measured by DLS.

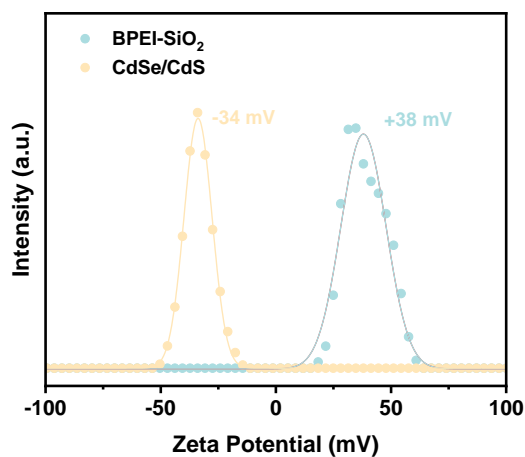

**Fig. S3.** Zeta potential ( $\xi$ ) of BPEI-SiO<sub>2</sub> and CdSe/CdS QDs.

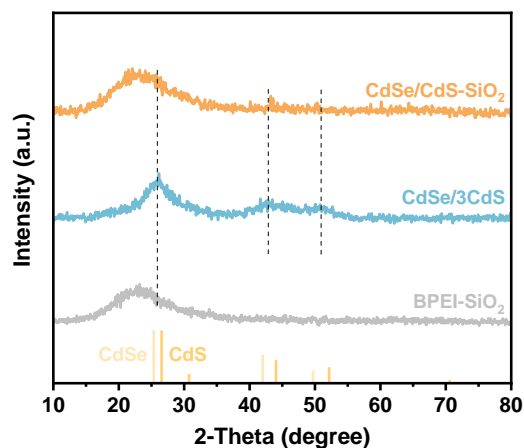

**Fig. S4.** XRD patterns of BPEI-SiO<sub>2</sub>, CdS/3CdS QDs and CdSe/CdS-SiO<sub>2</sub> composite.

**Note:** In the XRD pattern of CdSe/CdS-SiO<sub>2</sub> composite, no discernible characteristic peaks associated with CdSe/3CdS QDs are observed, presumably due to their low content, nanoscale dimensions, and uniform dispersion throughout the composites.<sup>2</sup>

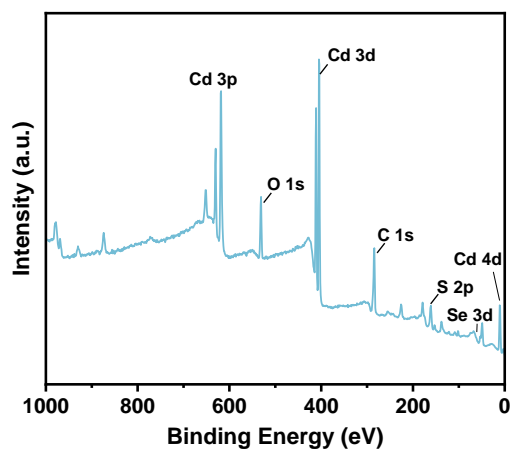

**Fig. S5.** XPS survey spectra of CdSe/CdS QDs.

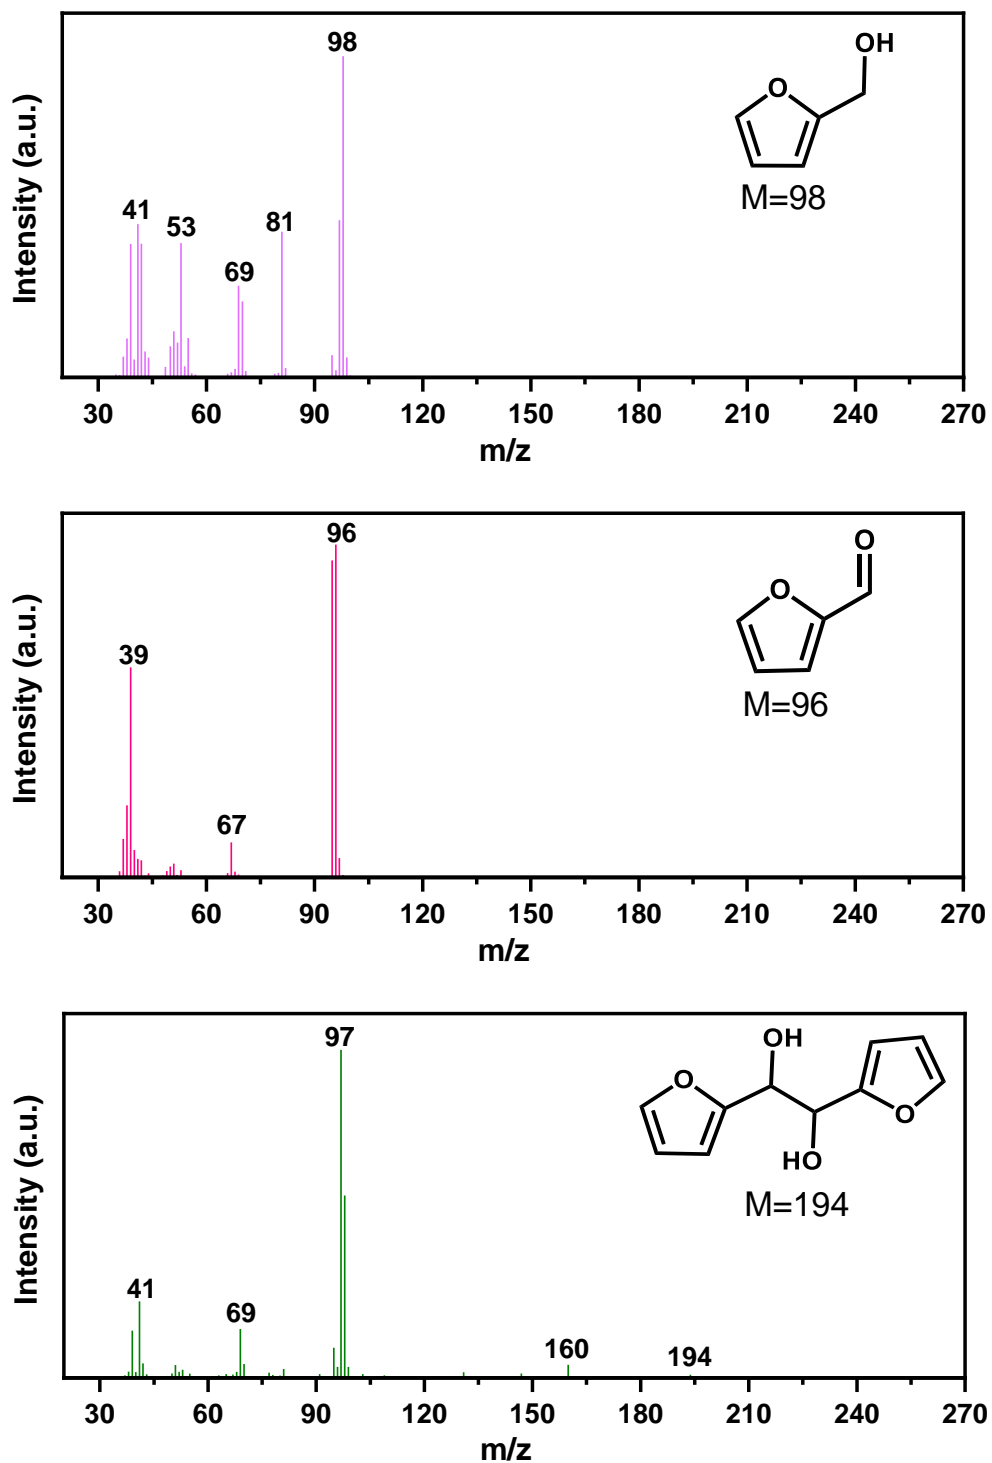

**Fig. S6.** Mass spectra of furfuryl alcohol (feedstock) and the obtained liquid products (furfural and hydrofuran).



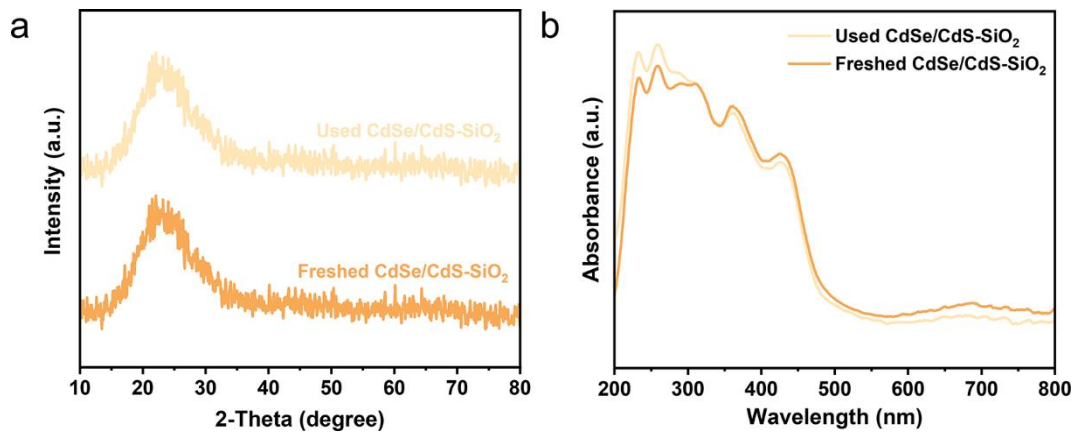

**Fig. S7.** (a) XRD patterns and (b) DRS spectra of fresh and used CdSe/CdS-SiO<sub>2</sub> composite.

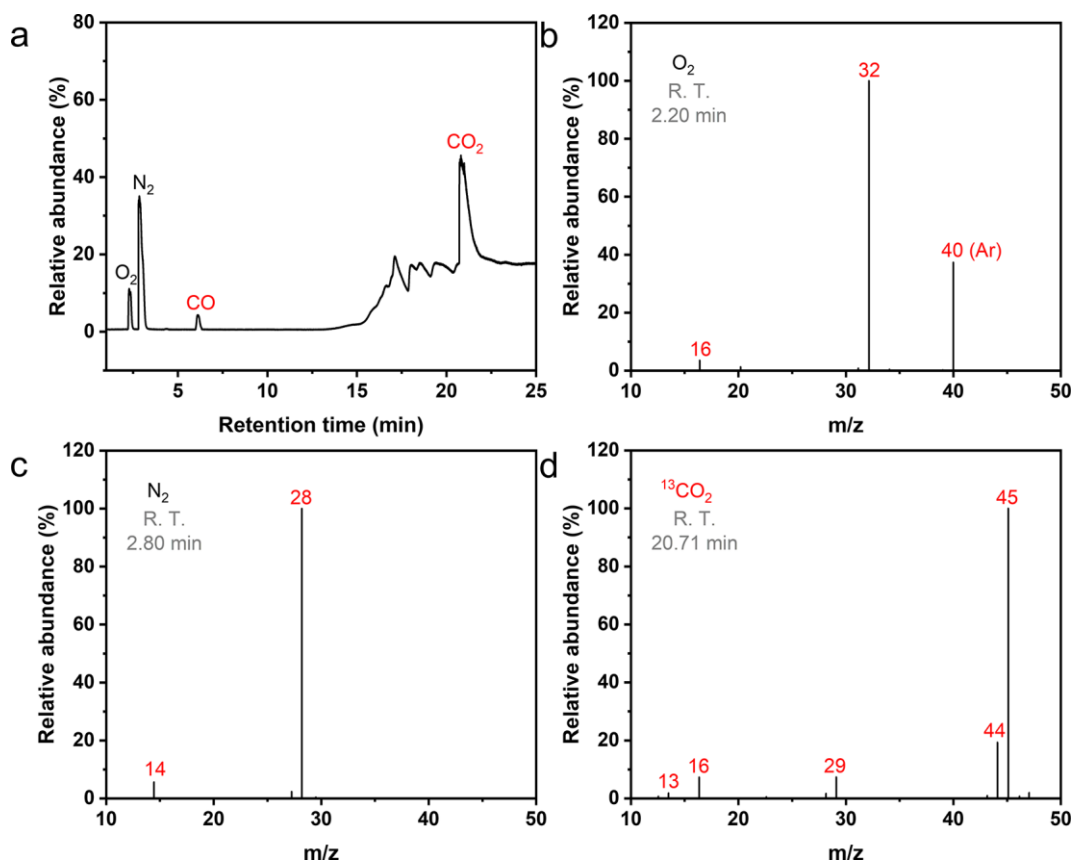

**Fig. S8.** (a) GC-MS analysis of CO<sub>2</sub> isotope tracing experiment using SH-Molecular Sieve 5A PLOT column and corresponding mass spectra of (b) O<sub>2</sub>, (c) N<sub>2</sub> and (d) CO<sub>2</sub>.

**Note:** As shown in **Fig. S8a**, O<sub>2</sub> (retention time (RT) at 2.20 min), N<sub>2</sub> (RT at 2.80 min), CO (RT at 5.99 min), and CO<sub>2</sub> (RT at 20.71 min) elute from SH-Molecular Sieve 5A PLOT one by one and generate the corresponding mass spectra (**Fig. S8b-d** and **Fig. 3g**), which match the standard mass spectra presented in the literature.<sup>3</sup> This demonstrates that the majority of CO originates from the photoreduction of labeled <sup>13</sup>CO<sub>2</sub>. Additionally, the peak with a low intensity and a m/z value of 44 (<sup>12</sup>CO<sub>2</sub>) in **Fig. S8d** derives from the decomposition of carbon residues on the catalyst surface.

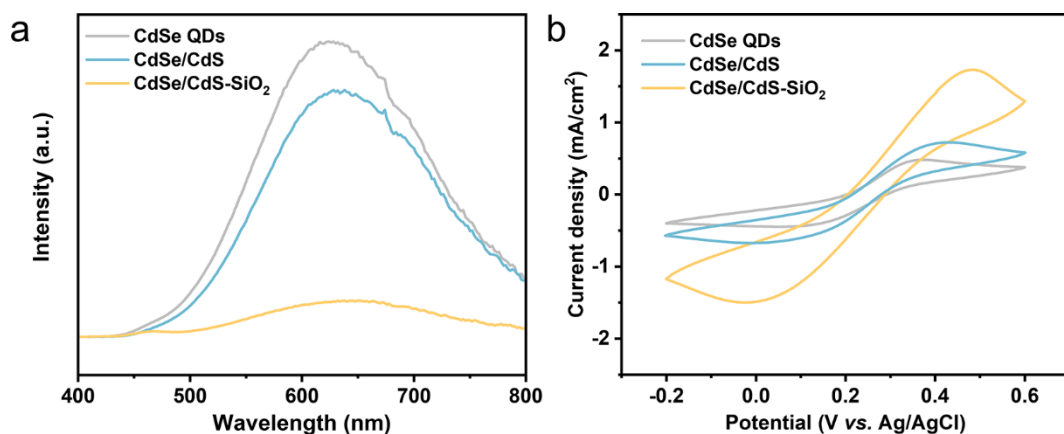

**Fig. S9.** (a) Steady-state PL emission spectra and (b) CV curves of CdSe QDs, CdSe/CdS QDs and CdSe/CdS-SiO<sub>2</sub> composite.

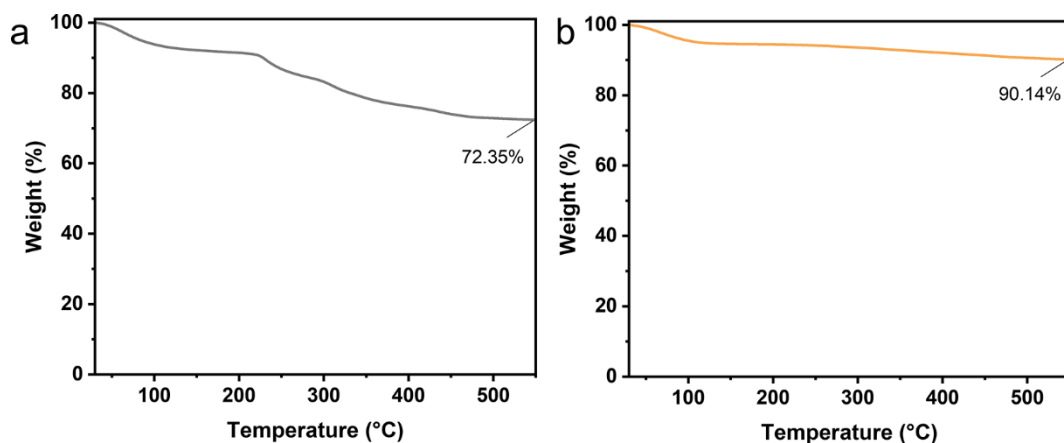

**Fig. S10.** TG curves of (a) CdSe/CdS QDs and (b) CdSe/CdS-SiO<sub>2</sub> composite.

**Note:** As displayed in **Fig. S10b**, the CdSe/CdS-SiO<sub>2</sub> sample exhibits a weight loss of only 9.86% when heated to 550 °C, primarily due to the removal of adsorbed and coordinated water. This indicates that CdSe/CdS-SiO<sub>2</sub> composite possesses excellent thermal stability, making it suitable for TPD experiments without thermal decomposition.<sup>4</sup> In contrast, CdSe/CdS QDs experience a significant mass loss of 27.65% at 550 °C, rendering them unsuitable for subsequent CO desorption experiments. Consequently, the CdSe-SiO<sub>2</sub> composite and CdSe/CdS-SiO<sub>2</sub> composite are chosen as the preferred samples in the CO<sub>2</sub> adsorption and CO desorption experiments.

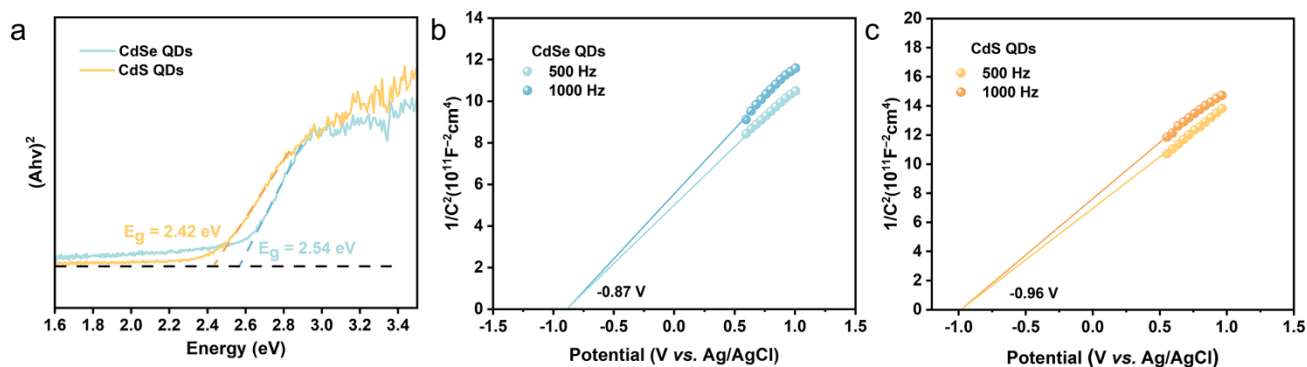

**Fig. S11.** (a) Tauc plots of CdSe and CdS QDs. Mott-Schottky plots of (b) CdSe QDs and (c) CdS QDs.

**Note:** The band gap energy of CdSe and CdS QDs was calculated based on the following formula:<sup>5</sup>

$$(Ah\nu)^n = K \cdot (h\nu - E_g)$$

In this equation,  $A$  represents the absorption coefficient,  $h\nu$  denotes the photon energy,  $K$  is a constant,  $E_g$  corresponds to the band gap energy,  $n$  is related to the type of semiconductor. Notably, CdSe and CdS are direct band gap semiconductors with  $n = 2$ . As shown in **Fig. S11a**, the  $E_g$  values evaluated for CdSe and CdS QDs are 2.54 and 2.42 eV, respectively (the  $E_g$  value of CdSe QDs increases due to their small particle size).<sup>6</sup> Moreover, based on Mott-Schottky analysis, the conduction band (CB) potentials of CdSe and CdS are estimated to be  $-0.87$  and  $-0.96$  V (vs.  $E_{Ag/AgCl}$ ), respectively. When converted to the normal hydrogen electrode (NHE), using the equation  $E_{NHE} = E_{Ag/AgCl} + 0.197$  at pH = 7, the CB potentials of CdSe and CdS are  $-0.67$  and  $-0.76$  V, respectively.<sup>7</sup> Consequently, the valence band potentials (vs.  $E_{NHE}$ ) are calculated to be  $+1.87$  and  $+1.66$  V for CdSe and CdS, respectively, indicating the type-II band structure in CdSe/CdS core-shell QDs (**Fig. 5e**).<sup>8,9</sup>

**Table S1.** The kinetic analysis of emission decay for CdSe QDs, CdSe/CdS QDs and CdSe/CdS-SiO<sub>2</sub> composite.

| Catalyst                  | A <sub>1</sub> (%) | τ <sub>1</sub> (ns) | A <sub>2</sub> (%) | τ <sub>2</sub> (ns) | τ <sub>a</sub> (ns) |
|---------------------------|--------------------|---------------------|--------------------|---------------------|---------------------|
| CdSe QDs                  | 0.62               | 4.94                | 0.53               | 58.39               | 53.54               |
| CdSe/CdS QDs              | 1.15               | 3.25                | 0.51               | 41.13               | 35.37               |
| CdSe/CdS-SiO <sub>2</sub> | 2.23               | 2.14                | 0.41               | 39.48               | 30.99               |

**Note:** The decay curves of the TRPL spectra are fitted with biexponential equation. The average emission lifetime (τ<sub>a</sub>) reflecting the overall emission decay behavior of the sample, which is calculated based on the following equation:<sup>10</sup>

$$I(t) = A_1 \exp(-t/\tau_1) + A_2 \exp(-t/\tau_2)$$

$$\tau_a = \frac{A_1 \tau_1^2 + A_2 \tau_2^2}{A_1 \tau_1 + A_2 \tau_2}$$

where τ<sub>1</sub> and τ<sub>2</sub> are the emission lifetimes, and A<sub>1</sub> and A<sub>2</sub> are the corresponding amplitudes.

## References

- 1 G. Liu, W. Liang, X. Xue, F. Rosei and Y. Wang, *Adv. Sci.*, 2021, **8**, 2102784.
- 2 M.-Y. Qi, Y.-H. Li, M. Anpo, Z.-R. Tang and Y.-J. Xu, *ACS Catal.*, 2020, **10**, 14327–14335.
- 3 S. Wang, B. Jiang, J. Henzie, F. Xu, C. Liu, X. Meng, S. Zou, H. Song, Y. Pan, H. Li, J. Yu, H. Chen and J. Ye, *Nat. Commun.*, 2023, **14**, 2534.
- 4 M.-Y. Qi and Y.-J. Xu, *Angew. Chem., Int. Ed.*, 2023, **62**, e202311731.
- 5 S. Qi, Y. Miao, J. Chen, H. Chu, B. Tian, B. Wu, Y. Li and B. Xin, *Nanomater.*, 2021, **11**, 1357.
- 6 Q. Guo, F. Liang, X.-B. Li, Y.-J. Gao, M.-Y. Huang, Y. Wang, S.-G. Xia, X.-Y. Gao, Q.-C. Gan, Z.-S. Lin, C.-H. Tung and L.-Z. Wu, *Chem*, 2019, **5**, 2605–2616.
- 7 A. P. Rangappa, D. Praveen Kumar, Y. Hong, S. Jeong, D. A. Reddy, J. K. Song and T. K. Kim, *ACS Appl. Energy Mater.*, 2020, **3**, 10533–10540.
- 8 Y. Nandan and M. S. Mehata, *Sci. Rep.*, 2019, **9**, 2.
- 9 S. Shenoy and K. Tarafder, *J. Phys.: Condens. Matter*, 2020, **32**, 275501.
- 10 C.-L. Tan, M.-Y. Qi, Z.-R. Tang and Y.-J. Xu, *ACS Catal.*, 2023, **13**, 8317–8329.
